# Supplementary material for: Phenotyping the Histopathological Subtypes of Non-Small-Cell Lung Carcinoma: How Beneficial Is Radiomics?
Source: MDPI journal article supplement (doi:10.3390/diagnostics13061167), 2023-03-18
Supplement: s1 [file s1]

# Supplementary Material

## Batch analysis and feature harmonization

| Kruskal-Wallis ANOVA Table |             |     |           |        |             |
|----------------------------|-------------|-----|-----------|--------|-------------|
| Source                     | SS          | df  | MS        | Chi-sq | Prob>Chi-sq |
| Groups                     | 2.30853e+06 | 2   | 1154263.7 | 127.3  | 2.28089e-28 |
| Error                      | 6.12433e+06 | 463 | 13227.5   |        |             |
| Total                      | 8.43285e+06 | 465 |           |        |             |

| Kruskal-Wallis ANOVA Table |             |     |           |        |             |
|----------------------------|-------------|-----|-----------|--------|-------------|
| Source                     | SS          | df  | MS        | Chi-sq | Prob>Chi-sq |
| Groups                     | 3.51784e+06 | 2   | 1758919.8 | 193.98 | 7.55124e-43 |
| Error                      | 4.91501e+06 | 463 | 10615.6   |        |             |
| Total                      | 8.43285e+06 | 465 |           |        |             |

Figure S1. Kruskal-Wallis for PC1 on top, Kruskal-Wallis for PC2 on the bottom for the 4-classes dataset.

| Kruskal-Wallis ANOVA Table |             |     |          |        |             |
|----------------------------|-------------|-----|----------|--------|-------------|
| Source                     | SS          | df  | MS       | Chi-sq | Prob>Chi-sq |
| Groups                     | 1.86791e+06 | 2   | 933957.3 | 134.32 | 6.78947e-30 |
| Error                      | 3.79183e+06 | 405 | 9362.5   |        |             |
| Total                      | 5.65974e+06 | 407 |          |        |             |

| Kruskal-Wallis ANOVA Table |             |     |            |        |             |
|----------------------------|-------------|-----|------------|--------|-------------|
| Source                     | SS          | df  | MS         | Chi-sq | Prob>Chi-sq |
| Groups                     | 2.19839e+06 | 2   | 1099196.11 | 158.09 | 4.69145e-35 |
| Error                      | 3.46135e+06 | 405 | 8546.54    |        |             |
| Total                      | 5.65974e+06 | 407 |            |        |             |

Figure S2. Kruskal-Wallis for PC1 on top, Kruskal-Wallis for PC2 on the bottom for the 3-classes dataset.

| Kruskal-Wallis ANOVA Table |           |     |        |        |             |
|----------------------------|-----------|-----|--------|--------|-------------|
| Source                     | SS        | df  | MS     | Chi-sq | Prob>Chi-sq |
| Groups                     | 884981.9  | 2   | 442491 | 116.06 | 6.29286e-26 |
| Error                      | 1410293.6 | 299 | 4716.7 |        |             |
| Total                      | 2295275.5 | 301 |        |        |             |

| Kruskal-Wallis ANOVA Table |           |     |          |        |             |
|----------------------------|-----------|-----|----------|--------|-------------|
| Source                     | SS        | df  | MS       | Chi-sq | Prob>Chi-sq |
| Groups                     | 773578.7  | 2   | 386789.3 | 101.45 | 9.35877e-23 |
| Error                      | 1521696.8 | 299 | 5089.3   |        |             |
| Total                      | 2295275.5 | 301 |          |        |             |

Figure S3. Kruskal-Wallis for PC1 on top, Kruskal-Wallis for PC2 on the bottom for the 2-classes dataset.

| Kruskal-Wallis ANOVA Table |           |     |         |        |             |
|----------------------------|-----------|-----|---------|--------|-------------|
| Source                     | SS        | df  | MS      | Chi-sq | Prob>Chi-sq |
| Groups                     | 40110.6   | 1   | 40110.6 | 2.21   | 0.137       |
| Error                      | 8392741.9 | 464 | 18087.8 |        |             |
| Total                      | 8432852.5 | 465 |         |        |             |

  

| Kruskal-Wallis ANOVA Table |              |     |         |        |             |
|----------------------------|--------------|-----|---------|--------|-------------|
| Source                     | SS           | df  | MS      | Chi-sq | Prob>Chi-sq |
| Groups                     | 36.4632      | 1   | 36.5    | 0      | 0.9642      |
| Error                      | 8432816.0368 | 464 | 18174.2 |        |             |
| Total                      | 8432852.5    | 465 |         |        |             |

**Figure S4.** Kruskal-Wallis for PC1 on top, Kruskal-Wallis for PC2 on the bottom after harmonization for the 4-classes dataset.

| Kruskal-Wallis ANOVA Table |           |     |         |        |             |
|----------------------------|-----------|-----|---------|--------|-------------|
| Source                     | SS        | df  | MS      | Chi-sq | Prob>Chi-sq |
| Groups                     | 33742.5   | 1   | 33742.5 | 2.43   | 0.1193      |
| Error                      | 5625999.5 | 406 | 13857.1 |        |             |
| Total                      | 5659742   | 407 |         |        |             |

  

| Kruskal-Wallis ANOVA Table |            |     |         |        |             |
|----------------------------|------------|-----|---------|--------|-------------|
| Source                     | SS         | df  | MS      | Chi-sq | Prob>Chi-sq |
| Groups                     | 1045.24    | 1   | 1045.2  | 0.08   | 0.784       |
| Error                      | 5658696.76 | 406 | 13937.7 |        |             |
| Total                      | 5659742    | 407 |         |        |             |

**Figure S5.** Kruskal-Wallis for PC1 on top, Kruskal-Wallis for PC2 on the bottom after harmonization for the 3-classes dataset.

| Kruskal-Wallis ANOVA Table |           |     |         |        |             |
|----------------------------|-----------|-----|---------|--------|-------------|
| Source                     | SS        | df  | MS      | Chi-sq | Prob>Chi-sq |
| Groups                     | 14597.7   | 1   | 14597.7 | 1.91   | 0.1665      |
| Error                      | 2280677.8 | 300 | 7602.3  |        |             |
| Total                      | 2295275.5 | 301 |         |        |             |

  

| Kruskal-Wallis ANOVA Table |            |     |         |        |             |
|----------------------------|------------|-----|---------|--------|-------------|
| Source                     | SS         | df  | MS      | Chi-sq | Prob>Chi-sq |
| Groups                     | 5485.27    | 1   | 5485.27 | 0.72   | 0.3964      |
| Error                      | 2289790.23 | 300 | 7632.63 |        |             |
| Total                      | 2295275.5  | 301 |         |        |             |

**Figure S6.** Kruskal-Wallis for PC1 on top, Kruskal-Wallis for PC2 on the bottom after harmonization for the 2-classes dataset.

# Feature selection and stability

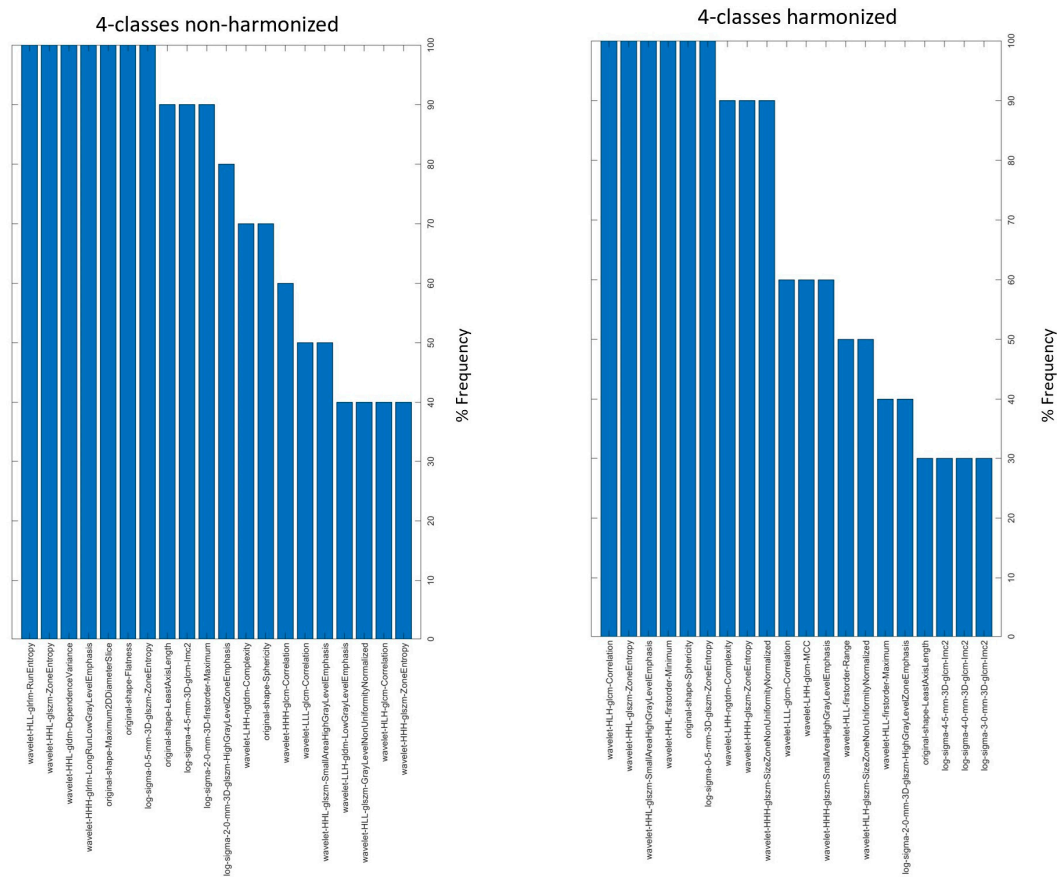

Figure S7. Feature stability for the 4-classes datasets

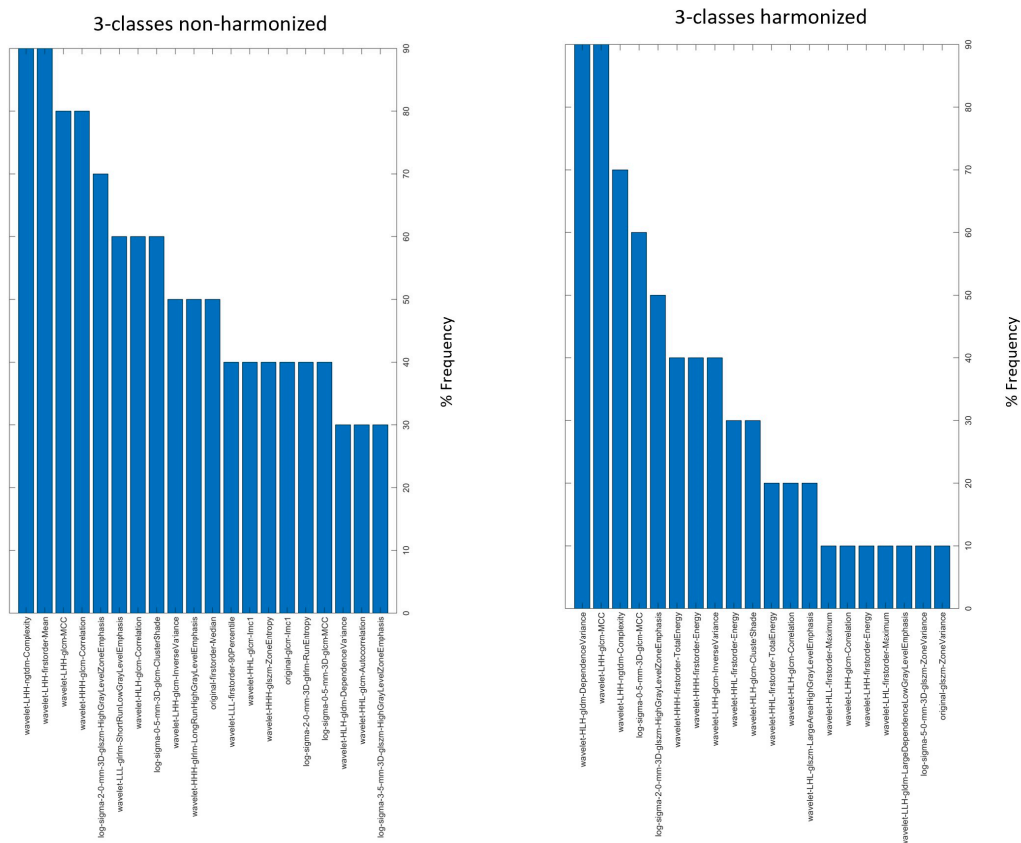

Figure S8. Feature stability for the 3-classes datasets

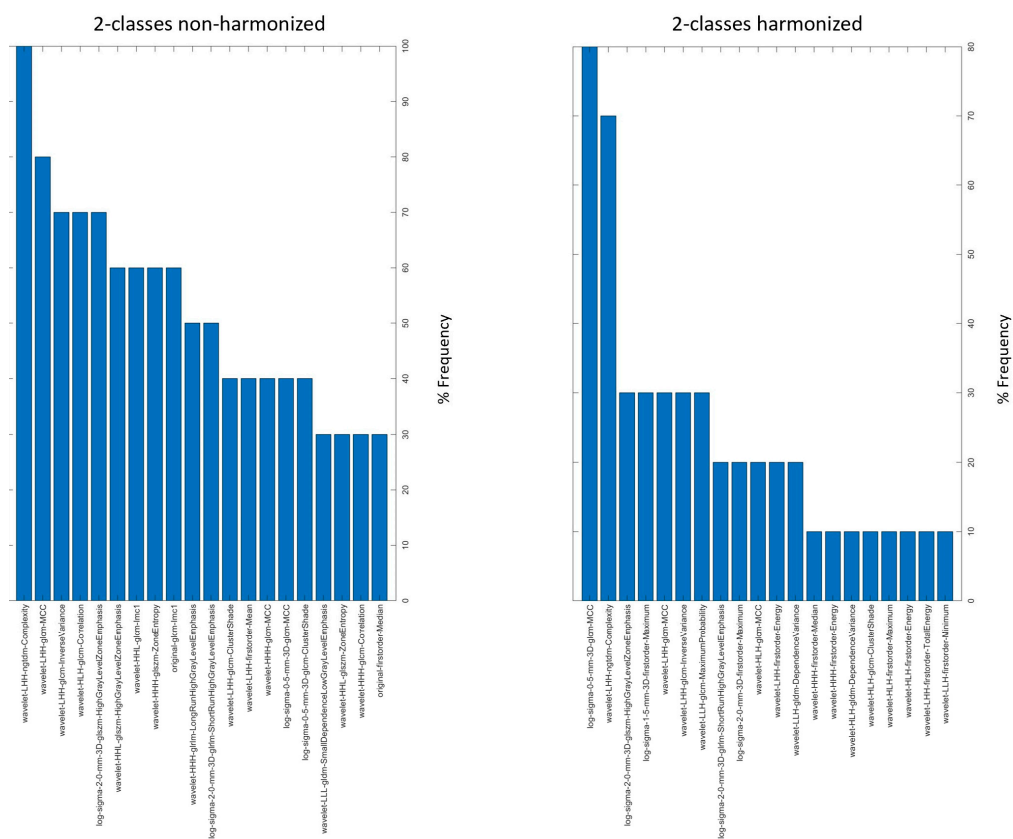

Figure S9. Feature stability for the 2-classes datasets

## Classification

**Table S1.** 4-classes dataset, **SVM: test accuracy = 0.6141±0.0317**

|          | auc                  | tpr                  | tnr                  | ppv                  | fscore               |
|----------|----------------------|----------------------|----------------------|----------------------|----------------------|
| NOS val  | 0.9614±0.0090        | 0.8908±0.0211        | 0.9819±0.0022        | 0.8770±0.0142        | 0.8830±0.0146        |
| NOS test | <b>0.9608±0.0325</b> | <b>0.8981±0.0546</b> | <b>0.9843±0.0088</b> | <b>0.8940±0.0585</b> | <b>0.8933±0.0162</b> |
| ADC val  | 0.8120±0.0095        | 0.6912±0.0173        | 0.8688±0.0103        | 0.7168±0.0180        | 0.7026±0.0209        |
| ADC test | 0.8225±0.0365        | 0.7059±0.0615        | 0.8783±0.0269        | 0.7404±0.0554        | 0.7205±0.0097        |
| LCC val  | 0.8015±0.0094        | 0.4264±0.0201        | 0.8517±0.0069        | 0.4513±0.0265        | 0.4268±0.0492        |
| LCC test | 0.7866±0.0331        | 0.4103±0.0650        | 0.8404±0.0188        | 0.4173±0.0438        | 0.4037±0.0540        |
| SCC val  | 0.7403±0.0063        | 0.5789±0.0157        | 0.7608±0.0107        | 0.5417±0.0102        | 0.5575±0.0504        |
| SCC test | 0.7233±0.0287        | 0.5588±0.0469        | 0.7520±0.0329        | 0.5247±0.0395        | 0.5378±0.0387        |

The highest values of interest are highlighted in bold.

**Table S2.** 4-classes dataset harmonized, **Ensemble: test accuracy = 0.5624±0.0555.**

|          | auc                  | tpr                  | tnr                  | ppv                  | fscore               |
|----------|----------------------|----------------------|----------------------|----------------------|----------------------|
| NOS val  | 0.9698±0.0075        | 0.9061±0.0107        | 0.9950±0.0016        | 0.9651±0.0109        | 0.9340±0.0091        |
| NOS test | <b>0.9573±0.0265</b> | <b>0.8848±0.0355</b> | <b>0.9972±0.0023</b> | <b>0.9793±0.0161</b> | <b>0.9281±0.0199</b> |
| ADC val  | 0.8106±0.0132        | 0.6665±0.0243        | 0.8164±0.0127        | 0.6332±0.0178        | 0.6484±0.0177        |
| ADC test | 0.7995±0.0494        | 0.6458±0.0701        | 0.8072±0.0354        | 0.6205±0.0627        | 0.6303±0.0621        |
| LCC val  | 0.7559±0.0120        | 0.3614±0.0411        | 0.8727±0.0175        | 0.4549±0.0240        | 0.3902±0.0305        |
| LCC test | 0.7296±0.0268        | 0.3128±0.0779        | 0.8550±0.0367        | 0.3760±0.0488        | 0.3255±0.0572        |
| SCC val  | 0.7224±0.0125        | 0.5677±0.0234        | 0.7365±0.0183        | 0.5141±0.0171        | 0.5360±0.0162        |
| SCC test | 0.6913±0.0360        | 0.5344±0.0594        | 0.7137±0.0424        | 0.4800±0.0440        | 0.4996±0.0432        |

The highest values of interest are highlighted in bold.

**Table S3.** 3-classes dataset, **KNN: test accuracy = 0.6027±0.0347**

|          | auc                  | tpr                  | tnr                  | ppv                  | fscore               |
|----------|----------------------|----------------------|----------------------|----------------------|----------------------|
| ADC val  | 0.8335±0.0100        | 0.7173±0.0096        | 0.8786±0.0102        | 0.7752±0.0148        | 0.7446±0.0100        |
| ADC test | <b>0.8519±0.0237</b> | <b>0.7390±0.0292</b> | <b>0.8814±0.0284</b> | <b>0.7900±0.0387</b> | <b>0.7616±0.0226</b> |
| LCC val  | 0.7684±0.0191        | 0.4791±0.0827        | 0.8196±0.0235        | 0.4815±0.0260        | 0.4677±0.0534        |
| LCC test | 0.7670±0.0371        | 0.4652±0.0713        | 0.8093±0.0652        | 0.4873±0.0782        | 0.4575±0.0493        |
| SCC val  | 0.7041±0.0214        | 0.5981±0.0298        | 0.7148±0.0458        | 0.5623±0.0342        | 0.5752±0.0160        |
| SCC test | 0.6855±0.0404        | 0.5627±0.0962        | 0.7120±0.0316        | 0.5311±0.0399        | 0.5408±0.0667        |

The highest values of interest are highlighted in bold.

**Table S4.** 3-classes dataset harmonized, **Ensemble: test accuracy = 0.5295±0.0555**

|          | auc                  | tpr                  | tnr                  | ppv                  | fscore               |
|----------|----------------------|----------------------|----------------------|----------------------|----------------------|
| ADC val  | 0.7501±0.0557        | 0.6374±0.0358        | 0.7896±0.0680        | 0.6492±0.0752        | 0.6407±0.0541        |
| ADC test | <b>0.7432±0.0616</b> | <b>0.6173±0.0656</b> | 0.7837±0.0627        | <b>0.6371±0.0870</b> | <b>0.6234±0.0723</b> |
| LCC val  | 0.6947±0.0648        | 0.3864±0.1118        | <b>0.8389±0.0445</b> | 0.4122±0.1069        | 0.3913±0.1056        |
| LCC test | 0.7064±0.0646        | 0.3833±0.1353        | 0.8255±0.0624        | 0.3876±0.1153        | 0.3744±0.1178        |
| SCC val  | 0.6551±0.0153        | 0.5638±0.0490        | 0.6763±0.0367        | 0.5122±0.0163        | 0.5319±0.0233        |
| SCC test | 0.6579±0.0471        | 0.5440±0.0757        | 0.6743±0.0817        | 0.5078±0.0527        | 0.5157±0.0470        |

The highest values of interest are highlighted in bold.

**Table S5.** 2-classes dataset, **KNN: test accuracy = 0.7725±0.0437**

|          | auc           | tpr           | tnr           | ppv           | fscore        |
|----------|---------------|---------------|---------------|---------------|---------------|
| ADC val  | 0.8244±0.0142 | 0.7525±0.0165 | 0.8084±0.0156 | 0.7947±0.0153 | 0.7728±0.0146 |
| ADC test | 0.8208±0.0350 | 0.7270±0.0638 | 0.8180±0.0356 | 0.7992±0.0396 | 0.7597±0.0499 |

The highest values of interest are highlighted in bold.

**Table S6.** 2-classes dataset harmonized, **Naïve-Bayes: test accuracy = 0.5857±0.0418**

|          | auc           | tpr           | tnr           | ppv           | fscore        |
|----------|---------------|---------------|---------------|---------------|---------------|
| ADC val  | 0.6146±0.0180 | 0.4640±0.0323 | 0.7589±0.0310 | 0.6247±0.0486 | 0.5271±0.0346 |
| ADC test | 0.5933±0.0541 | 0.4187±0.0645 | 0.7527±0.0719 | 0.5987±0.0768 | 0.4842±0.0619 |

The highest values of interest are highlighted in bold.
